# Supplementary material for: Low-pressure gas chromatography with chemical ionization mass spectrometry for quantification of multifunctional organic compounds in the atmosphere
Source: Copernicus journal article supplement (doi:10.5194/amt-2018-223), 2018-07-18
Supplement: Supplementary file 1 [file amt-2018-223-supplement.pdf]

## S1 Instrument Calibration

Instrument calibrations were performed using four authentic standards for hydrogen cyanide (HCN), sulfur dioxide (SO<sub>2</sub>), hydroxyacetone (HAc) and glycolaldehyde (GLYC) with HR-ToF-CIMS. For HCN and SO<sub>2</sub>, calibrations were performed using a standard gas mixture (300 ppmv in N<sub>2</sub> and 50 ppmv in N<sub>2</sub>, respectively) which were individually diluted with N<sub>2</sub> using mass flow controllers prior to being sampled by the HR-ToF-CIMS. Cylinder concentrations of these two gases were verified using Fourier-transform infrared spectroscopy (FTIR) using cross section data archived in the Pacific Northwest National Lab (PNNL) IR database (Sharpe et al., 2004). Gas-phase HAc mixture was created by flowing dry N<sub>2</sub> over the commercially available compound (Aldrich, 90%) into a 0.1 m<sup>3</sup> bag made of fluorinated ethylene propylene (Teflon-FEP) to obtain several ppmv HAc. This mixture was then further diluted with N<sub>2</sub> after being measured by the FTIR before entering the instrument. Gas-phase GLYC was produced by flowing dry N<sub>2</sub> through three-ported vial which contained the commercially available glycolaldehyde dimer (Aldrich). During this process, the three way vial was gently heated and cotton was inserted downstream of the vial to collect particles and low vapor pressure impurities before the gas was transferred to the 0.1 m<sup>3</sup> bag. The remainder of the procedure for GLYC mirrors that of HAc.

Though we were able to calibrate these four gases, many compounds of interest are not commercially available and difficult to synthesize and purify. Therefore, the above experiments were performed simultaneously on the c-ToF-CIMS in order to directly compare the sensitivities of these two instruments. On average, the c-ToF-CIMS was  $1.37 \pm 0.22$  times more sensitive than HR-ToF-CIMS under the same operating conditions of the field deployments. For the analysis described within the main text, we use this ratio between the two instrument sensitivities to convert previously determined C-ToF-CIMS sensitivities from calibrations or estimated from the ion-molecule collision rate which can be calculated using the dipole and polarizability of the analyte species (Paulot et al., 2009; Garden et al., 2009; Crouse et al., 2011).

## S2 Instrument Characterization

A number of chamber experiments were performed to properly characterize the GC-HR-ToF-CIMS both prior to and following field deployment. A list of experiments discussed in this study can be found in Table S1.

### S2.1 Reagents

1-propene (propene) (> 99%), 1-butene (> 99%), *cis*-2-butene (> 99%), *trans*-2-butene (> 99%) 2-methyl-propene (> 99%), isoprene (> 98%) and hydrogen peroxide (H<sub>2</sub>O<sub>2</sub>; 30% by weight in water) were purchased from Sigma Aldrich and used without further purification in the amounts listed in Table S1. A nitric oxide standard gas tank (NO; 1994 ppmv in high purity N<sub>2</sub>) used for the majority of experiments was prepared by Matheson. Methyl nitrite (CH<sub>3</sub>ONO) was synthesized, purified and stored in a glass trap submerged in liquid nitrogen using methods described in Taylor et al. (1980). In most cases, CH<sub>3</sub>ONO served as the HO<sub>x</sub> precursor.

### S2.2 Chamber Experiments

Instrument characterization experiments were conducted in either a 0.1 m<sup>3</sup> or 0.8 m<sup>3</sup> Teflon bag with a 6.35 mm PFA port used for the introduction and sampling of gases. During each experiment, the bag was filled with appropriate concentrations of reactants and placed inside a enclosure with UV reflective surfaces and eight UV lights ( $\lambda_{peak} = 350$  nm). Addition of the alkene, CH<sub>3</sub>ONO and NO was accomplished by filling a 500 cm<sup>3</sup> glass bulb with the compound to the desired pressure before filling with N<sub>2</sub> to reach approximately 993 hPa. If needed, the reagent gas was serially diluted up to two times by pumping down the bulb to the desired pressure and backfilling again with N<sub>2</sub>. The contents of the bulb were then transferred to the chamber with the remaining bag volume filled with dry zero air. For experiment 4, H<sub>2</sub>O<sub>2</sub> served as the HO<sub>x</sub> source. Addition of H<sub>2</sub>O<sub>2</sub> into the chamber was performed by flowing 20 L min<sup>-1</sup> N<sub>2</sub> over 8  $\mu$ L of H<sub>2</sub>O<sub>2</sub> contained in a shallow glass vial for approximately 10 - 15 minutes to create a bag concentration of  $\sim 2$  ppmv H<sub>2</sub>O<sub>2</sub>. In experiment 6, high RH conditions ( $\sim 50\%$ ) were created by filling a portion of the bag volume with dry zero air that has passed through a water bubbler prior to entering the chamber.

Once all reagents were in the chamber bag, photochemistry was initiated upon illumination of 1-8 UV lights. Alkene oxidation occurred at approximately 298 K, with the exception of experiment 5 which was performed at an elevated temperature (315 K) to allow for increased rates of unimolecular isomerization. Experiment 5 also required longer peroxy radical lifetimes to produce a sufficient GC signal of these isomerization products. This was performed by using a single UV light in which all direct radiation was blocked allowing only the photons scattered off the walls to contribute to the chemistry.

For the majority of experiments, photochemistry was stopped when approximately 10% of the alkene had reacted, to minimize secondary chemistry of products. Chamber air was then sampled by the GC-HR-ToF-CIMS at approximately 2-3 L min<sup>-1</sup> through ~2.4 m of 5.84 mm ID tubing to reduce residence time in and speed equilibration of the sampling line. Chamber analysis typically alternated between the direct CIMS and GC-CIMS sampling to assess any changes in concentration or transmission that may occur throughout the experiment. In most cases, GC effluent was directed into the ion source to allow for enhanced signal to noise (HS mode, see main text). Divergence from this procedure occurred during experiments 1 and 2 when determining the ion source enhancement ratio. During this time, each GC cycle alternated between HS mode and FT mode and the ratio of these two types of GC signals which were used to determine the signal enhancement. In addition, output from the GC during trapping was also occasionally directed into the mass spectrometer to monitor potential breakthrough.

**Table S1.** Instrument characterization experiment list

| Expt | HO <sub>x</sub> Source, ppbv         | NO, ppbv | VOC, ppbv                     | Objective                       |
|------|--------------------------------------|----------|-------------------------------|---------------------------------|
| 1    | CH <sub>3</sub> ONO, 50              | 100      | Isoprene, 50                  | IonSrc Enhancement Ratio        |
| 2    | CH <sub>3</sub> ONO, 100             | 500      | Isoprene, 100                 | IonSrc Enhancement Ratio        |
| 3    | CH <sub>3</sub> ONO, 100             | 500      | Isoprene, 100                 | IHN Peak Assignment             |
| 4    | H <sub>2</sub> O <sub>2</sub> , 2000 | 0        | Isoprene, 100                 | ISOPOOH + IEPOX Peak Assignment |
| 5    | CH <sub>3</sub> ONO, 100             | 0        | Isoprene, 100                 | HPALD Peak Assignment           |
| 6    | CH <sub>3</sub> ONO, 100             | 500      | Isoprene, 100                 | Column Humidity Effect          |
| 7    | CH <sub>3</sub> ONO, 100             | 500      | <i>trans</i> -2-Butene, 100   | Butene HN Peak Assignment       |
| 8    | CH <sub>3</sub> ONO, 100             | 500      | 2-methyl-Propene, 100         | Butene HN Peak Assignment       |
| 9    | CH <sub>3</sub> ONO, 100             | 500      | 1-Butene, 100                 | Butene HN Peak Assignment       |
| 10   | CH <sub>3</sub> ONO, 100             | 500      | <i>cis</i> -2-Butene, 100     | Butene HN Peak Assignment       |
| 11   | CH <sub>3</sub> ONO, 100             | 500      | Propene, 100                  | Propene HN Peak Assignment      |
| 12   | CH <sub>3</sub> ONO, 100             | 500      | Propene, 100<br>Isoprene, 100 | Trap Linearity Test             |

### S3 GC Cryotrap Performance

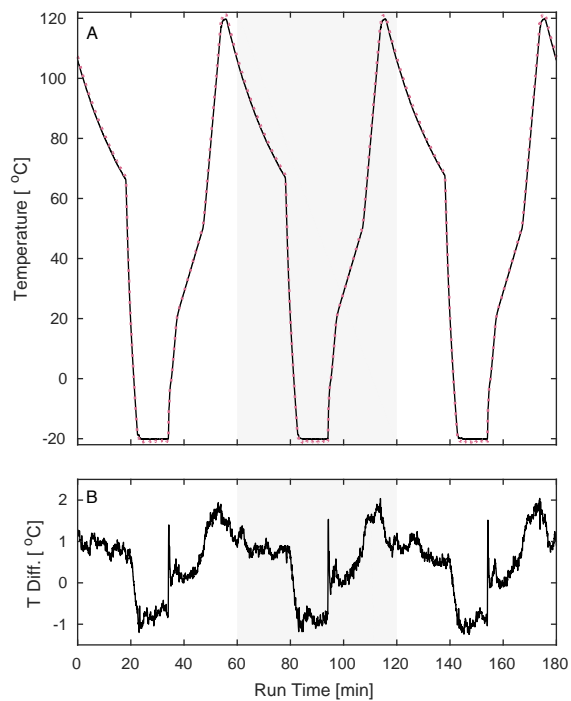

**Figure S1.** (A) Temperature profiles for three consecutive GC runs demonstrating the reproducibility of GC temperature despite frequent thermal cycling. (B) Temperature difference between locations (1) and (2) on the GC (see Fig. 2, main text) show a consistently small temperature gradient ( $< 2^{\circ}\text{C}$ ) across the column during the temperature program. Ambient temperatures during these GC cycles ranged between  $27.8 - 33.2^{\circ}\text{C}$ .

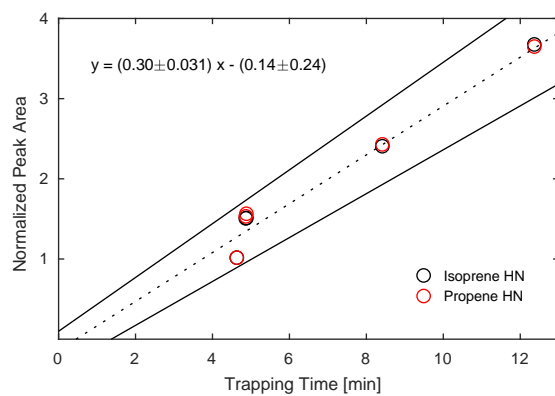

**Figure S2.** Chromatogram peak areas as a function of trapping time (and, as a result, trapping volume). Analytes were cryofocused on the GC column held at  $-20^{\circ}\text{C}$ . Circles represent the sum of the peak areas of the two dominant IHN isomers (black) and the two isomers of propene HN (red) normalized to samples trapped at 4 minutes.

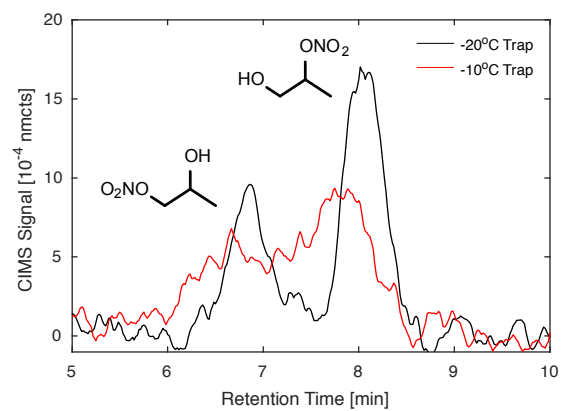

**Figure S3.** Comparison of consecutive chromatograms obtained during the Caltech field study of propene HN trapped at  $-20^{\circ}\text{C}$  (black) and  $-10^{\circ}\text{C}$  (red), demonstrating the effect trapping temperature can have on the chromatography of higher volatile species.

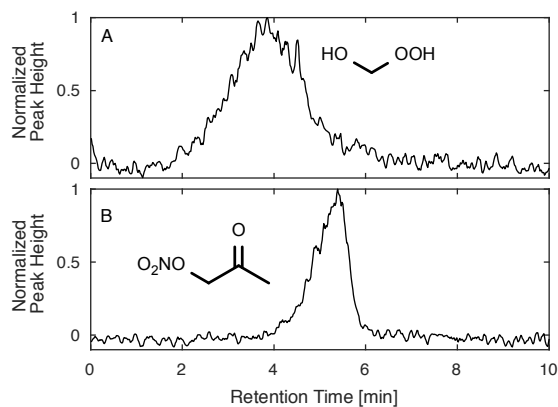

**Figure S4.** Chromatograms obtained during the Caltech field study field data for (A) hydroxymethyl hydroperoxide (HMHP) and (B) propanone nitrate (PROPNN) demonstrating irregular peak shapes that can result for higher volatility species during typical trapping conditions used in this study. Further optimization of GC cryotrapping is needed in order to better quantify these compounds through GC analysis. GC signal shown here has been normalized to the largest peak in the displayed window.

## S4 Ion Fragmentation

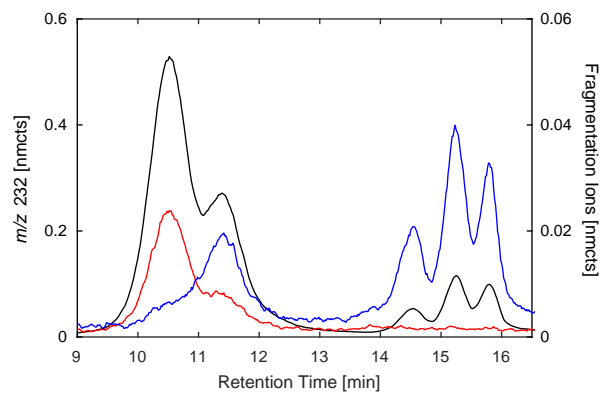

**Figure S5.** Examples of fragmentation ions of IHN resulting from direct electron attachment to IHN. The primary product ion from IHN clustering with  $\text{CF}_3\text{O}^-$  ( $m/z$  232, black) is compared with fragmentation ions resulting from electron attachment ( $m/z$  99, blue and  $m/z$  146, red) These fragment ions can provide additional structural information. For example  $m/z$  99 has high yields from primary and secondary IHN structures while  $m/z$  146 has high yields from  $\beta$ -hydroxy nitrates.



## References

- Crouse, J. D., Paulot, F., Kjaergaard, H. G., and Wennberg, P. O.: Peroxy radical isomerization in the oxidation of isoprene, *Phys Chem Chem Phys*, 13, 13 607 – 13 613, <https://doi.org/10.1039/C1CP21330J>, 2011.
- 5 Garden, A. L., Paulot, F., Crouse, J. D., Maxwell-Cameron, I. J., Wennberg, P. O., and Kjaergaard, H. G.: Calculation of conformationally weighted dipole moments useful in ion–molecule collision rate estimates, *Chem Phys Lett*, 474, 45–50, <https://doi.org/10.1016/j.cplett.2009.04.038>, 2009.
- Paulot, F., Crouse, J. D., Kjaergaard, H. G., Kroll, J. H., Seinfeld, J. H., and Wennberg, P. O.: Isoprene photooxidation: new insights into the production of acids and organic nitrates, *Atmos Chem Phys*, 9, 1479 – 1501, <https://doi.org/10.5194/acp-9-1479-2009>, 2009.
- 10 Sharpe, S. W., Johnson, T. J., Sams, R. L., Chu, P. M., Rhoderick, G. C., and Johnson, P. A.: Gas-Phase Databases for Quantitative Infrared Spectroscopy, *Appl Spectrosc*, 58, 1452–1461, <https://doi.org/10.1366/0003702042641281>, <https://doi.org/10.1366/0003702042641281>, PMID: 15606959, 2004.
- Taylor, W. D., Allston, T. D., Moscato, M. J., Fazekas, G. B., Kozlowski, R., and Takacs, G. A.: Atmospheric photodissociation lifetimes for nitromethane, methyl nitrite, and methyl nitrate, *Int J Chem Kinet*, 12, 231 – 240, <https://doi.org/10.1002/kin.550120404>, 1980.
